# Supplementary material for: Experimental and Theoretical Investigation of Thiazolyl Blue as a Corrosion Inhibitor for Copper in Neutral Sodium Chloride Solution
Source: MDPI journal article supplement (doi:10.3390/ma11061042), 2018-06-19
Supplement: s1 [file s1]

# Experimental and Theoretical Investigation of Thiazolyl Blue as a Corrosion Inhibitor for Copper in Neutral Sodium Chloride Solution

Li Feng <sup>1</sup>, Yujie Qiang <sup>1</sup>, Shengtao Zhang <sup>1,2,\*</sup>, Yue Xu <sup>1</sup>, Lei Guo <sup>3,\*</sup>, Loutfy H. Madkour <sup>4</sup> and Shijin Chen <sup>5</sup>

<sup>1</sup> School of Chemistry and Chemical Engineering, Chongqing University, Chongqing 400044, China; fengli\_cqu@163.com (L.F.); yqiang\_cqu@163.com (Y.Q.); cqtanjc@163.com (Y.X.)

<sup>2</sup> Material Corrosion and Protection Key Laboratory of Sichuan province, Zigong 643000, China

<sup>3</sup> School of Material and Chemical Engineering, Tongren University, Tongren 554300, China

<sup>4</sup> Chemistry Department, Faculty of Science and Arts, Al Baha University, Baljarashi 65635, Saudi Arabia; loutfy\_madkour@yahoo.com

<sup>5</sup> Bomim Electronics Ltd., Meizhou 514021, China; fwjshen@163.com (S. C.)

\* Correspondence: stzhang@cqu.edu.cn (S.Z.); cqglei@163.com (L.G.)

Received: 24 May 2018; Accepted: 13 June 2018; Published: 19 June 2018

## Durability test

For all electrochemical tests, immersing and testing are conducted in 3% NaCl solution with and without MTT. The OCP potential reaches a steady state for 1800s, suggesting the protective film can be formed in a short time. Furthermore, the durability measurement was performed to explore the durability of the Cu-MTT film. Figure S shows the impedance diagram for copper electrode in 5 mM MTT solution with different immersion time at 298 K. The inhibition effect increases when the immersion time is less than 3 h (95.7% for 0.5 h, 96.4% for 1 h, 96.8% for 2 h, 97.1% for 3 h), which is due to the rearrangement of adsorbed layer. The efficiency decreases slightly when the immersion time is more than 3 hours (97.1% for 4 h, 97.05% for 5 h, 91.8% for 10 h), which is owing to the desorption of film and unsound film. It can be seen that the film is stable in a short period of time (<5 h). However, when the immersion time is more than 10 h, the protective effect of the film becomes worse. This is due to corrosive substances in the solution such as Cl<sup>-</sup> or unsound film.

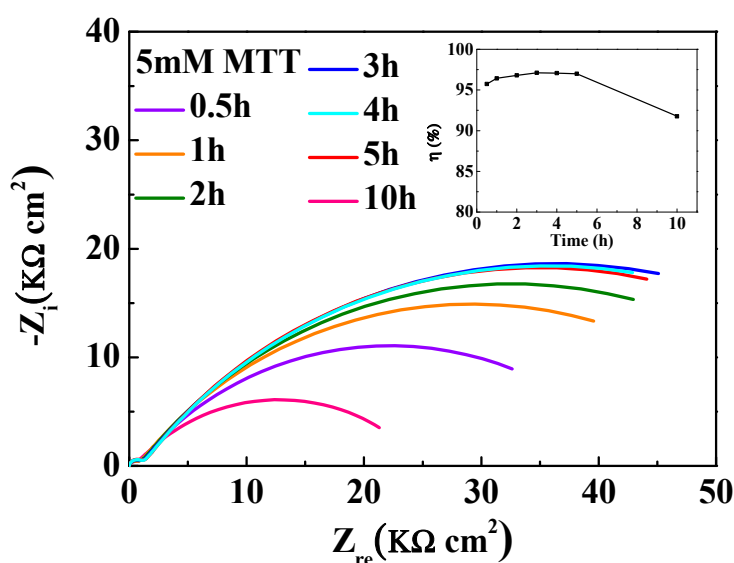

**Figure S.** The impedance diagram for copper electrode in 5 mM MTT solution with different immersion time at 298 K.
